# Supplementary material for: Global target mRNA specification and regulation by the RNA-binding protein ZFP36
Source: PubMed Central journal article supplement (PMC4053807; doi:10.1186/gb-2014-15-1-r12), 2014-01-08

# Supplemental Figure 4

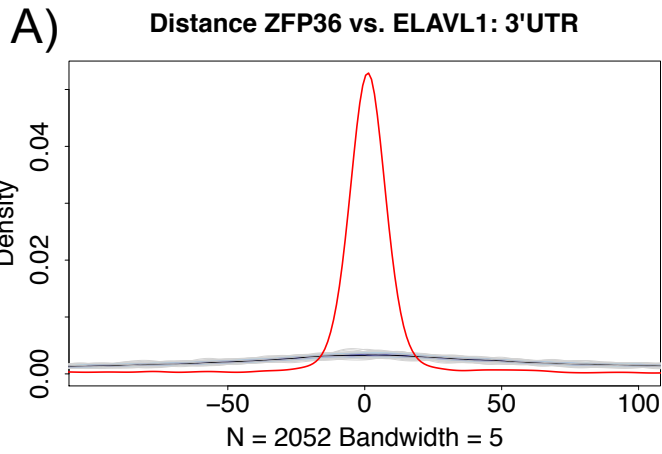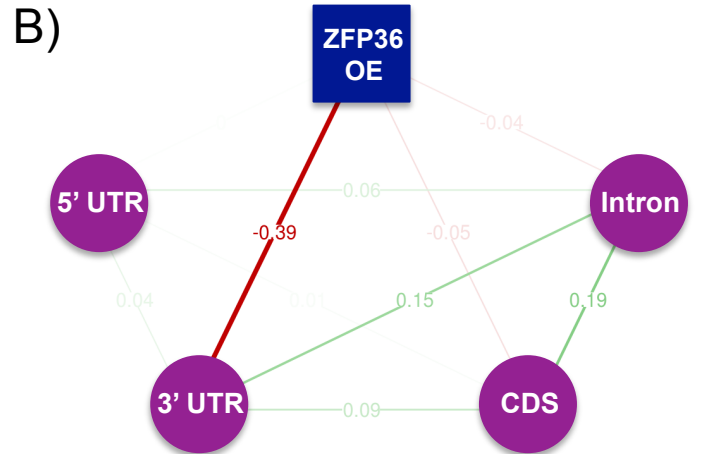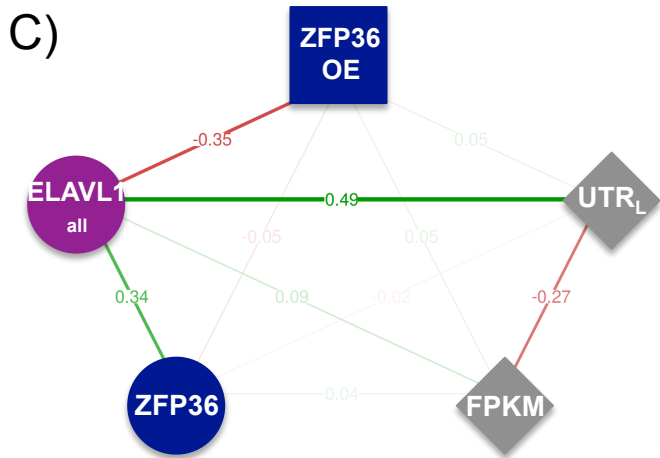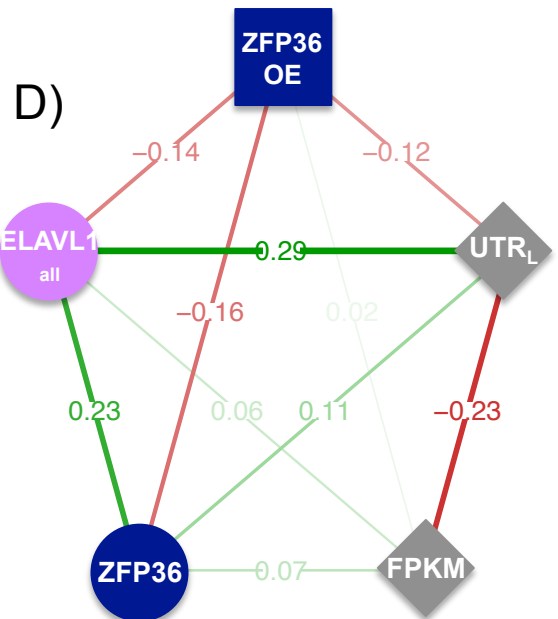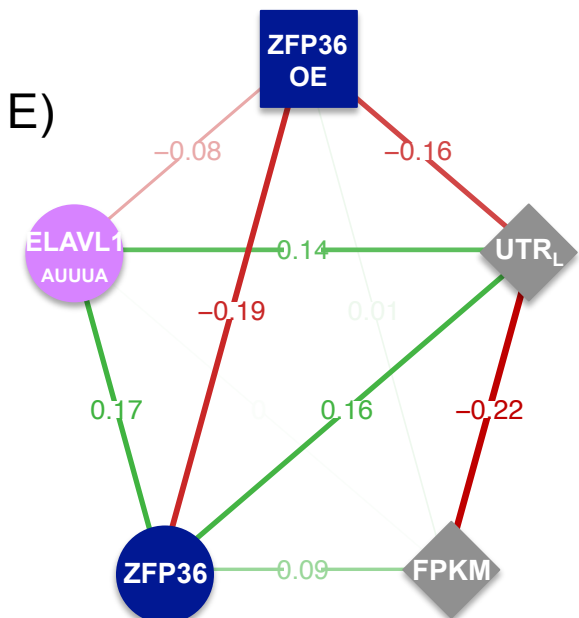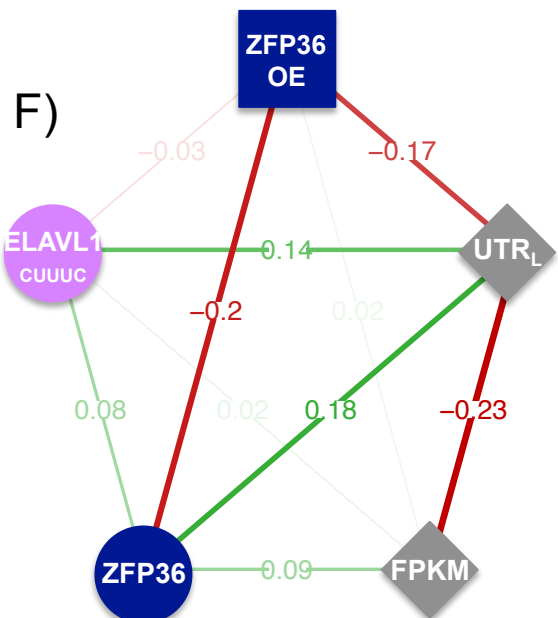

Supplement: gb-2014-15-1-r12-S7.pdf [file gb-2014-15-1-r12-S7.pdf]
